# Supplementary material
Source: publisher figshare collection journal article supplement (https://gsajournals.figshare.com/ndownloader/files/22247619)
Supplement: Supplementary file 1 [file 22247619]

#Supplementary Table S8. Differentially expressed genes in each over-represented custom category.,,,,,,,,
,AGI,sample,time for treatment,reference,regulated,category,description,name
1,AT5G20250,Col_1h_rH_down,1h,Col under high R/FR,down,ABAdown, Raffinose synthase family protein ,DIN10;RS6
2,AT5G61590,Col_1h_rH_down,1h,Col under high R/FR,down,ABAdown, Integrase-type DNA-binding superfamily protein ,DEWAX;ERF107
3,AT1G78270,Col_1h_rH_down,1h,Col under high R/FR,down,ABAdown, UDP-glucosyl transferase 85A4 ,AtUGT85A4;UGT85A4
4,AT5G03380,Col_1h_rH_down,1h,Col under high R/FR,down,ABAdown, Heavy metal transport/detoxification superfamily protein  ,NA
5,AT4G17870,Col_1h_rH_down,1h,Col under high R/FR,down,ABAdown, Polyketide cyclase/dehydrase and lipid transport superfamily protein ,PYR1;RCAR11
6,AT1G69760,Col_1h_rH_down,1h,Col under high R/FR,down,ABAdown, unknown protein; BEST Arabidopsis thaliana protein match is: unknown protein (TAIR:AT1G26920.1); Has 51 Blast hits to 51 proteins in 15 species: Archae - 0; Bacteria - 2; Metazoa - 2; Fungi - 7; Plants - 29; Viruses - 0; Other Eukaryotes - 11 (source: NCBI BLink). ,NA
7,AT4G39800,Col_1h_rH_up,1h,Col under high R/FR,up,BLdown, myo-inositol-1-phosphate synthase 1 ,ATIPS1;ATMIPS1;MI-1-P SYNTHASE;MIPS1
8,AT5G12050,Col_1h_rH_up,1h,Col under high R/FR,up,BLdown, unknown protein; BEST Arabidopsis thaliana protein match is: unknown protein (TAIR:AT3G13980.1); Has 1807 Blast hits to 1807 proteins in 277 species: Archae - 0; Bacteria - 0; Metazoa - 736; Fungi - 347; Plants - 385; Viruses - 0; Other Eukaryotes - 339 (source: NCBI BLink). ,BG1
9,AT5G12050,Col_1h_rH_up,1h,Col under high R/FR,up,IAAup, unknown protein; BEST Arabidopsis thaliana protein match is: unknown protein (TAIR:AT3G13980.1); Has 1807 Blast hits to 1807 proteins in 277 species: Archae - 0; Bacteria - 0; Metazoa - 736; Fungi - 347; Plants - 385; Viruses - 0; Other Eukaryotes - 339 (source: NCBI BLink). ,BG1
10,AT4G32280,Col_1h_rH_up,1h,Col under high R/FR,up,IAAup, indole-3-acetic acid inducible 29 ,IAA29
11,AT3G15540,Col_1h_rH_up,1h,Col under high R/FR,up,IAAup, indole-3-acetic acid inducible 19 ,IAA19;MSG2
12,AT2G26710,Col_1h_rH_up,1h,Col under high R/FR,up,IAAup, Cytochrome P450 superfamily protein ,BAS1;CYP72B1;CYP734A1
13,AT5G52900,Col_1h_rH_up,1h,Col under high R/FR,up,IAAup, unknown protein; Has 30201 Blast hits to 17322 proteins in 780 species: Archae - 12; Bacteria - 1396; Metazoa - 17338; Fungi - 3422; Plants - 5037; Viruses - 0; Other Eukaryotes - 2996 (source: NCBI BLink). ,MAKR6
14,AT5G47370,Col_1h_rH_up,1h,Col under high R/FR,up,IAAup, Homeobox-leucine zipper protein 4 (HB-4) / HD-ZIP protein ,HAT2
15,AT3G25570,Col_1h_rH_up,1h,Col under high R/FR,up,MJup, Adenosylmethionine decarboxylase family protein ,SAMDC3
16,AT5G44050,Col_1h_rH_up,1h,Col under high R/FR,up,MJup, MATE efflux family protein ,AtDTX28
17,AT1G32640,Col_1h_rH_up,1h,Col under high R/FR,up,MJup, Basic helix-loop-helix (bHLH) DNA-binding family protein ,ATMYC2;JAI1;JIN1;MYC2;RD22BP1;ZBF1
18,AT4G31500,Col_1h_rH_up,1h,Col under high R/FR,up,MJup," cytochrome P450, family 83, subfamily B, polypeptide 1 ",ATR4;CYP83B1;RED1;RNT1;SUR2
19,AT2G43020,Col_1h_rH_up,1h,Col under high R/FR,up,MJup, polyamine oxidase 2 ,ATPAO2;PAO2
20,AT3G22840,Col_1h_rH_up,1h,Col under high R/FR,up,MYC234up, Chlorophyll A-B binding family protein ,ELIP;ELIP1
21,AT1G32640,Col_1h_rH_up,1h,Col under high R/FR,up,MYC234up, Basic helix-loop-helix (bHLH) DNA-binding family protein ,ATMYC2;JAI1;JIN1;MYC2;RD22BP1;ZBF1
22,AT4G31500,Col_1h_rH_up,1h,Col under high R/FR,up,MYC234up," cytochrome P450, family 83, subfamily B, polypeptide 1 ",ATR4;CYP83B1;RED1;RNT1;SUR2
23,AT4G32280,Col_1h_rH_up,1h,Col under high R/FR,up,PIFtarget, indole-3-acetic acid inducible 29 ,IAA29
24,AT5G39860,Col_1h_rH_up,1h,Col under high R/FR,up,PIFtarget, basic helix-loop-helix (bHLH) DNA-binding family protein ,BHLH136;BNQ1;PRE1
25,AT3G15540,Col_1h_rH_up,1h,Col under high R/FR,up,PIFtarget, indole-3-acetic acid inducible 19 ,IAA19;MSG2
26,AT5G47370,Col_1h_rH_up,1h,Col under high R/FR,up,PIFtarget, Homeobox-leucine zipper protein 4 (HB-4) / HD-ZIP protein ,HAT2
27,AT4G16780,Col_1h_rH_up,1h,Col under high R/FR,up,PIFtarget, homeobox protein 2 ,ATHB-2;ATHB2;HAT4;HB-2
28,AT3G22840,Col_49h_rH_up,49h,Col under high R/FR,up,MYC234up, Chlorophyll A-B binding family protein ,ELIP;ELIP1
29,AT4G08870,Col_49h_rH_up,49h,Col under high R/FR,up,MYC234up, Arginase/deacetylase superfamily protein ,ARGAH2
30,AT3G49680,Col_49h_rH_up,49h,Col under high R/FR,up,MYC234up, branched-chain aminotransferase 3 ,ATBCAT-3;BCAT3
31,AT1G78370,Col_49h_rH_up,49h,Col under high R/FR,up,MYC234up, glutathione S-transferase TAU 20 ,ATGSTU20;GSTU20
32,AT2G22330,myc234_1h_rCol_rH_down,1h,Col under high R/FR,down,IAAdown," cytochrome P450, family 79, subfamily B, polypeptide 3 ",CYP79B3
33,AT4G39950,myc234_1h_rCol_rH_down,1h,Col under high R/FR,down,IAAdown," cytochrome P450, family 79, subfamily B, polypeptide 2 ",CYP79B2
34,AT3G03190,myc234_1h_rCol_rH_down,1h,Col under high R/FR,down,IAAdown, glutathione S-transferase F11 ,ATGSTF11;ATGSTF6;GSTF11
35,AT4G29700,myc234_1h_rCol_rH_down,1h,Col under high R/FR,down,IAAdown, Alkaline-phosphatase-like family protein ,NA
36,AT4G31500,myc234_1h_rCol_rH_down,1h,Col under high R/FR,down,MJup," cytochrome P450, family 83, subfamily B, polypeptide 1 ",ATR4;CYP83B1;RED1;RNT1;SUR2
37,AT3G58990,myc234_1h_rCol_rH_down,1h,Col under high R/FR,down,MJup, isopropylmalate isomerase 1 ,IPMI1
38,AT4G39940,myc234_1h_rCol_rH_down,1h,Col under high R/FR,down,MJup, APS-kinase 2 ,AKN2;APK2
39,AT1G24100,myc234_1h_rCol_rH_down,1h,Col under high R/FR,down,MJup, UDP-glucosyl transferase 74B1 ,UGT74B1
40,AT1G18590,myc234_1h_rCol_rH_down,1h,Col under high R/FR,down,MJup, sulfotransferase 17 ,ATSOT17;ATST5C;SOT17
41,AT2G14750,myc234_1h_rCol_rH_down,1h,Col under high R/FR,down,MJup, APS kinase ,AKN1;APK;APK1;ATAKN1
42,AT2G46650,myc234_1h_rCol_rH_down,1h,Col under high R/FR,down,MJup, cytochrome B5 isoform C ,ATCB5-C;B5 #1;CB5-C;CYTB5-C
43,AT3G22740,myc234_1h_rCol_rH_down,1h,Col under high R/FR,down,MJup, homocysteine S-methyltransferase 3 ,HMT3
44,AT1G62560,myc234_1h_rCol_rH_down,1h,Col under high R/FR,down,MJup, flavin-monooxygenase glucosinolate S-oxygenase 3 ,FMO GS-OX3
45,AT1G74100,myc234_1h_rCol_rH_down,1h,Col under high R/FR,down,MJup, sulfotransferase 16 ,ATSOT16;ATST5A;CORI-7;SOT16
46,AT2G22330,myc234_1h_rCol_rH_down,1h,Col under high R/FR,down,MJup," cytochrome P450, family 79, subfamily B, polypeptide 3 ",CYP79B3
47,AT4G39950,myc234_1h_rCol_rH_down,1h,Col under high R/FR,down,MJup," cytochrome P450, family 79, subfamily B, polypeptide 2 ",CYP79B2
48,AT1G52000,myc234_1h_rCol_rH_down,1h,Col under high R/FR,down,MJup, Mannose-binding lectin superfamily protein ,NA
49,AT1G52040,myc234_1h_rCol_rH_down,1h,Col under high R/FR,down,MJup, myrosinase-binding protein 1 ,ATMBP;MBP1
50,AT2G20610,myc234_1h_rCol_rH_down,1h,Col under high R/FR,down,MJup, Tyrosine transaminase family protein ,ALF1;HLS3;RTY;RTY1;SUR1
51,AT1G65860,myc234_1h_rCol_rH_down,1h,Col under high R/FR,down,MJup, flavin-monooxygenase glucosinolate S-oxygenase 1 ,FMO GS-OX1
52,AT4G30530,myc234_1h_rCol_rH_down,1h,Col under high R/FR,down,MJup, Class I glutamine amidotransferase-like superfamily protein ,GGP1
53,AT5G44720,myc234_1h_rCol_rH_down,1h,Col under high R/FR,down,MJup, Molybdenum cofactor sulfurase family protein ,NA
54,AT1G14250,myc234_1h_rCol_rH_down,1h,Col under high R/FR,down,MJup, GDA1/CD39 nucleoside phosphatase family protein ,NA
55,AT2G38860,myc234_1h_rCol_rH_down,1h,Col under high R/FR,down,MJup, Class I glutamine amidotransferase-like superfamily protein ,DJ-1e;DJ1E;YLS5
56,AT4G14680,myc234_1h_rCol_rH_down,1h,Col under high R/FR,down,MJup, Pseudouridine synthase/archaeosine transglycosylase-like family protein ,APS3;ATPS3
57,AT3G28220,myc234_1h_rCol_rH_down,1h,Col under high R/FR,down,MJup, TRAF-like family protein ,NA
58,AT2G43530,myc234_1h_rCol_rH_down,1h,Col under high R/FR,down,MJup, Scorpion toxin-like knottin superfamily protein ,NA
59,AT2G29450,myc234_1h_rCol_rH_down,1h,Col under high R/FR,down,MJup, glutathione S-transferase tau  5 ,AT103-1A;ATGSTU1;ATGSTU5;GSTU5
60,AT1G52410,myc234_1h_rCol_rH_down,1h,Col under high R/FR,down,MJup, TSK-associating protein 1 ,AtTSA1;TSA1
61,AT5G06870,myc234_1h_rCol_rH_down,1h,Col under high R/FR,down,MJup, polygalacturonase inhibiting protein 2 ,ATPGIP2;PGIP2
62,AT5G54390,myc234_1h_rCol_rH_down,1h,Col under high R/FR,down,MJup, HAL2-like ,AHL;ATAHL;HL
63,AT3G03190,myc234_1h_rCol_rH_down,1h,Col under high R/FR,down,MJup, glutathione S-transferase F11 ,ATGSTF11;ATGSTF6;GSTF11
64,AT5G07460,myc234_1h_rCol_rH_down,1h,Col under high R/FR,down,MJup, peptidemethionine sulfoxide reductase 2 ,ATMSRA2;PMSR2
65,AT2G06050,myc234_1h_rCol_rH_down,1h,Col under high R/FR,down,MJup, oxophytodienoate-reductase 3 ,AtOPR3;DDE1;OPR3
66,AT4G29700,myc234_1h_rCol_rH_down,1h,Col under high R/FR,down,MJup, Alkaline-phosphatase-like family protein ,NA
67,AT2G39330,myc234_1h_rCol_rH_down,1h,Col under high R/FR,down,MJup, jacalin-related lectin 23 ,JAL23
68,AT3G16470,myc234_1h_rCol_rH_down,1h,Col under high R/FR,down,MJup, Mannose-binding lectin superfamily protein ,AtJAC1;JAL35;JR1
69,AT1G60260,myc234_1h_rCol_rH_down,1h,Col under high R/FR,down,MJup, beta glucosidase 5 ,BGLU5
70,AT5G24780,myc234_1h_rCol_rH_down,1h,Col under high R/FR,down,MJup, vegetative storage protein 1 ,ATVSP1;VSP1
71,AT4G18440,myc234_1h_rCol_rH_down,1h,Col under high R/FR,down,MJup, L-Aspartase-like family protein ,NA
72,AT1G60270,myc234_1h_rCol_rH_down,1h,Col under high R/FR,down,MJup, beta glucosidase 6 ,BGLU6
73,AT4G17470,myc234_1h_rCol_rH_down,1h,Col under high R/FR,down,MJup, alpha/beta-Hydrolases superfamily protein ,NA
74,AT2G36080,myc234_1h_rCol_rH_down,1h,Col under high R/FR,down,MJup, AP2/B3-like transcriptional factor family protein ,ABS2;NGAL1
75,AT5G63980,myc234_1h_rCol_rH_down,1h,Col under high R/FR,down,MJup, Inositol monophosphatase family protein ,ALX8;AtFRY1;ATSAL1;FRY1;HOS2;RON1;SAL1;SUPO1
76,AT5G43580,myc234_1h_rCol_rH_down,1h,Col under high R/FR,down,MJup," Serine protease inhibitor, potato inhibitor I-type family protein ",UPI
77,AT1G19670,myc234_1h_rCol_rH_down,1h,Col under high R/FR,down,MJup, chlorophyllase 1 ,ATCLH1;ATHCOR1;CLH1;CORI1
78,AT5G67150,myc234_1h_rCol_rH_down,1h,Col under high R/FR,down,MJup, HXXXD-type acyl-transferase family protein ,NA
79,AT2G04400,myc234_1h_rCol_rH_down,1h,Col under high R/FR,down,MJup, Aldolase-type TIM barrel family protein ,IGPS
80,AT2G43550,myc234_1h_rCol_rH_down,1h,Col under high R/FR,down,MJup, Scorpion toxin-like knottin superfamily protein ,NA
81,AT5G02940,myc234_1h_rCol_rH_down,1h,Col under high R/FR,down,MJup, Protein of unknown function (DUF1012) ,NA
82,AT3G23030,myc234_1h_rCol_rH_down,1h,Col under high R/FR,down,MJup, indole-3-acetic acid inducible 2 ,IAA2
83,AT1G56650,myc234_1h_rCol_rH_down,1h,Col under high R/FR,down,MJup, production of anthocyanin pigment 1 ,ATMYB75;AtPAP1;MYB75;PAP1;SIAA1
84,AT1G76790,myc234_1h_rCol_rH_down,1h,Col under high R/FR,down,MJup, O-methyltransferase family protein ,IGMT5
85,AT1G66760,myc234_1h_rCol_rH_down,1h,Col under high R/FR,down,MJup, MATE efflux family protein ,NA
86,AT1G31550,myc234_1h_rCol_rH_down,1h,Col under high R/FR,down,MJup, GDSL-like Lipase/Acylhydrolase superfamily protein ,NA
87,AT1G44350,myc234_1h_rCol_rH_down,1h,Col under high R/FR,down,MJup, IAA-leucine resistant (ILR)-like gene 6 ,ILL6
88,AT1G24625,myc234_1h_rCol_rH_down,1h,Col under high R/FR,down,MJup, zinc finger protein 7 ,ZFP7
89,AT5G39790,myc234_1h_rCol_rH_down,1h,Col under high R/FR,down,MJup, 5'-AMP-activated protein kinase-related ,PTST
90,AT1G31710,myc234_1h_rCol_rH_down,1h,Col under high R/FR,down,MJup, Copper amine oxidase family protein ,NA
91,AT1G78210,myc234_1h_rCol_rH_down,1h,Col under high R/FR,down,MJup, alpha/beta-Hydrolases superfamily protein ,NA
92,AT1G53885,myc234_1h_rCol_rH_down,1h,Col under high R/FR,down,MJup, Protein of unknown function (DUF581) ,NA
93,AT1G54050,myc234_1h_rCol_rH_down,1h,Col under high R/FR,down,MJup, HSP20-like chaperones superfamily protein ,NA
94,AT1G52400,myc234_1h_rCol_rH_down,1h,Col under high R/FR,down,MJup, beta glucosidase 18 ,ATBG1;BGL1;BGLU18
95,AT4G31500,myc234_1h_rCol_rH_down,1h,Col under high R/FR,down,MYC234up," cytochrome P450, family 83, subfamily B, polypeptide 1 ",ATR4;CYP83B1;RED1;RNT1;SUR2
96,AT1G16410,myc234_1h_rCol_rH_down,1h,Col under high R/FR,down,MYC234up, cytochrome p450 79f1 ,BUS1;CYP79F1;SPS1
97,AT3G19710,myc234_1h_rCol_rH_down,1h,Col under high R/FR,down,MYC234up, branched-chain aminotransferase4 ,BCAT4
98,AT3G02020,myc234_1h_rCol_rH_down,1h,Col under high R/FR,down,MYC234up, aspartate kinase 3 ,AK3
99,AT3G58990,myc234_1h_rCol_rH_down,1h,Col under high R/FR,down,MYC234up, isopropylmalate isomerase 1 ,IPMI1
100,AT5G14200,myc234_1h_rCol_rH_down,1h,Col under high R/FR,down,MYC234up, isopropylmalate dehydrogenase 1 ,ATIMD1;IMD1
101,AT4G39940,myc234_1h_rCol_rH_down,1h,Col under high R/FR,down,MYC234up, APS-kinase 2 ,AKN2;APK2
102,AT2G43100,myc234_1h_rCol_rH_down,1h,Col under high R/FR,down,MYC234up, isopropylmalate isomerase 2 ,ATLEUD1;IPMI2
103,AT1G24100,myc234_1h_rCol_rH_down,1h,Col under high R/FR,down,MYC234up, UDP-glucosyl transferase 74B1 ,UGT74B1
104,AT2G25450,myc234_1h_rCol_rH_down,1h,Col under high R/FR,down,MYC234up, 2-oxoglutarate (2OG) and Fe(II)-dependent oxygenase superfamily protein ,NA
105,AT4G13770,myc234_1h_rCol_rH_down,1h,Col under high R/FR,down,MYC234up," cytochrome P450, family 83, subfamily A, polypeptide 1 ",CYP83A1;REF2
106,AT1G18590,myc234_1h_rCol_rH_down,1h,Col under high R/FR,down,MYC234up, sulfotransferase 17 ,ATSOT17;ATST5C;SOT17
107,AT2G14750,myc234_1h_rCol_rH_down,1h,Col under high R/FR,down,MYC234up, APS kinase ,AKN1;APK;APK1;ATAKN1
108,AT3G54600,myc234_1h_rCol_rH_down,1h,Col under high R/FR,down,MYC234up, Class I glutamine amidotransferase-like superfamily protein ,DJ-1f;DJ1F
109,AT4G04610,myc234_1h_rCol_rH_down,1h,Col under high R/FR,down,MYC234up, APS reductase 1 ,APR;APR1;ATAPR1;PRH19
110,AT2G46650,myc234_1h_rCol_rH_down,1h,Col under high R/FR,down,MYC234up, cytochrome B5 isoform C ,ATCB5-C;B5 #1;CB5-C;CYTB5-C
111,AT1G74090,myc234_1h_rCol_rH_down,1h,Col under high R/FR,down,MYC234up, desulfo-glucosinolate sulfotransferase 18 ,ATSOT18;ATST5B;SOT18
112,AT1G62560,myc234_1h_rCol_rH_down,1h,Col under high R/FR,down,MYC234up, flavin-monooxygenase glucosinolate S-oxygenase 3 ,FMO GS-OX3
113,AT4G12030,myc234_1h_rCol_rH_down,1h,Col under high R/FR,down,MYC234up, bile acid transporter 5 ,BASS5;BAT5
114,AT1G78370,myc234_1h_rCol_rH_down,1h,Col under high R/FR,down,MYC234up, glutathione S-transferase TAU 20 ,ATGSTU20;GSTU20
115,AT1G74100,myc234_1h_rCol_rH_down,1h,Col under high R/FR,down,MYC234up, sulfotransferase 16 ,ATSOT16;ATST5A;CORI-7;SOT16
116,AT4G14040,myc234_1h_rCol_rH_down,1h,Col under high R/FR,down,MYC234up, selenium-binding protein 2 ,EDA38;SBP2
117,AT2G22330,myc234_1h_rCol_rH_down,1h,Col under high R/FR,down,MYC234up," cytochrome P450, family 79, subfamily B, polypeptide 3 ",CYP79B3
118,AT5G23010,myc234_1h_rCol_rH_down,1h,Col under high R/FR,down,MYC234up, methylthioalkylmalate synthase 1 ,GSM1;IMS3;MAM1
119,AT4G39950,myc234_1h_rCol_rH_down,1h,Col under high R/FR,down,MYC234up," cytochrome P450, family 79, subfamily B, polypeptide 2 ",CYP79B2
120,AT1G52000,myc234_1h_rCol_rH_down,1h,Col under high R/FR,down,MYC234up, Mannose-binding lectin superfamily protein ,NA
121,AT1G52040,myc234_1h_rCol_rH_down,1h,Col under high R/FR,down,MYC234up, myrosinase-binding protein 1 ,ATMBP;MBP1
122,AT2G20610,myc234_1h_rCol_rH_down,1h,Col under high R/FR,down,MYC234up, Tyrosine transaminase family protein ,ALF1;HLS3;RTY;RTY1;SUR1
123,AT1G65860,myc234_1h_rCol_rH_down,1h,Col under high R/FR,down,MYC234up, flavin-monooxygenase glucosinolate S-oxygenase 1 ,FMO GS-OX1
124,AT4G30530,myc234_1h_rCol_rH_down,1h,Col under high R/FR,down,MYC234up, Class I glutamine amidotransferase-like superfamily protein ,GGP1
125,AT1G52030,myc234_1h_rCol_rH_down,1h,Col under high R/FR,down,MYC234up, myrosinase-binding protein 2 ,F-ATMBP;MBP1.2;MBP2
126,AT1G14250,myc234_1h_rCol_rH_down,1h,Col under high R/FR,down,MYC234up, GDA1/CD39 nucleoside phosphatase family protein ,NA
127,AT2G31790,myc234_1h_rCol_rH_down,1h,Col under high R/FR,down,MYC234up, UDP-Glycosyltransferase superfamily protein ,NA
128,AT3G28220,myc234_1h_rCol_rH_down,1h,Col under high R/FR,down,MYC234up, TRAF-like family protein ,NA
129,AT4G17880,myc234_1h_rCol_rH_down,1h,Col under high R/FR,down,MYC234up, Basic helix-loop-helix (bHLH) DNA-binding family protein ,MYC4
130,AT3G23570,myc234_1h_rCol_rH_down,1h,Col under high R/FR,down,MYC234up, alpha/beta-Hydrolases superfamily protein ,NA
131,AT1G52410,myc234_1h_rCol_rH_down,1h,Col under high R/FR,down,MYC234up, TSK-associating protein 1 ,AtTSA1;TSA1
132,AT3G22840,myc234_1h_rCol_rH_down,1h,Col under high R/FR,down,MYC234up, Chlorophyll A-B binding family protein ,ELIP;ELIP1
133,AT5G01500,myc234_1h_rCol_rH_down,1h,Col under high R/FR,down,MYC234up, thylakoid ATP/ADP carrier ,TAAC
134,AT3G03190,myc234_1h_rCol_rH_down,1h,Col under high R/FR,down,MYC234up, glutathione S-transferase F11 ,ATGSTF11;ATGSTF6;GSTF11
135,AT2G06050,myc234_1h_rCol_rH_down,1h,Col under high R/FR,down,MYC234up, oxophytodienoate-reductase 3 ,AtOPR3;DDE1;OPR3
136,AT4G04830,myc234_1h_rCol_rH_down,1h,Col under high R/FR,down,MYC234up, methionine sulfoxide reductase B5 ,ATMSRB5;MSRB5
137,AT4G29700,myc234_1h_rCol_rH_down,1h,Col under high R/FR,down,MYC234up, Alkaline-phosphatase-like family protein ,NA
138,AT2G39330,myc234_1h_rCol_rH_down,1h,Col under high R/FR,down,MYC234up, jacalin-related lectin 23 ,JAL23
139,AT1G21440,myc234_1h_rCol_rH_down,1h,Col under high R/FR,down,MYC234up, Phosphoenolpyruvate carboxylase family protein ,NA
140,AT3G49680,myc234_1h_rCol_rH_down,1h,Col under high R/FR,down,MYC234up, branched-chain aminotransferase 3 ,ATBCAT-3;BCAT3
141,AT1G11580,myc234_1h_rCol_rH_down,1h,Col under high R/FR,down,MYC234up, methylesterase PCR A ,ATPMEPCRA;PMEPCRA
142,AT4G17470,myc234_1h_rCol_rH_down,1h,Col under high R/FR,down,MYC234up, alpha/beta-Hydrolases superfamily protein ,NA
143,AT1G19670,myc234_1h_rCol_rH_down,1h,Col under high R/FR,down,MYC234up, chlorophyllase 1 ,ATCLH1;ATHCOR1;CLH1;CORI1
144,AT1G56650,myc234_1h_rCol_rH_down,1h,Col under high R/FR,down,MYC234up, production of anthocyanin pigment 1 ,ATMYB75;AtPAP1;MYB75;PAP1;SIAA1
145,AT1G44350,myc234_1h_rCol_rH_down,1h,Col under high R/FR,down,MYC234up, IAA-leucine resistant (ILR)-like gene 6 ,ILL6
146,AT1G52400,myc234_1h_rCol_rH_down,1h,Col under high R/FR,down,MYC234up, beta glucosidase 18 ,ATBG1;BGL1;BGLU18
147,AT3G22210,myc234_1h_rCol_rH_down,1h,Col under high R/FR,down,Sadown, unknown protein; FUNCTIONS IN: molecular_function unknown; INVOLVED IN: biological_process unknown; LOCATED IN: endomembrane system; EXPRESSED IN: 21 plant structures; EXPRESSED DURING: 13 growth stages; Has 26 Blast hits to 26 proteins in 13 species: Archae - 0; Bacteria - 0; Metazoa - 0; Fungi - 0; Plants - 26; Viruses - 0; Other Eukaryotes - 0 (source: NCBI BLink). ,NA
148,AT5G48490,myc234_1h_rCol_rH_down,1h,Col under high R/FR,down,Sadown, Bifunctional inhibitor/lipid-transfer protein/seed storage 2S albumin superfamily protein ,DIR1-like
149,AT2G43530,myc234_1h_rCol_rH_down,1h,Col under high R/FR,down,Sadown, Scorpion toxin-like knottin superfamily protein ,NA
150,AT4G33666,myc234_1h_rCol_rH_down,1h,Col under high R/FR,down,Sadown, unknown protein; FUNCTIONS IN: molecular_function unknown; INVOLVED IN: biological_process unknown; LOCATED IN: chloroplast; EXPRESSED IN: 19 plant structures; EXPRESSED DURING: 11 growth stages; Has 30201 Blast hits to 17322 proteins in 780 species: Archae - 12; Bacteria - 1396; Metazoa - 17338; Fungi - 3422; Plants - 5037; Viruses - 0; Other Eukaryotes - 2996 (source: NCBI BLink). ,NA
151,AT2G22170,myc234_1h_rCol_rH_down,1h,Col under high R/FR,down,Sadown," Lipase/lipooxygenase, PLAT/LH2 family protein ",PLAT2
152,AT2G39705,myc234_1h_rCol_rH_down,1h,Col under high R/FR,down,Sadown, ROTUNDIFOLIA like 8 ,DVL11;RTFL8
153,AT3G45140,myc234_1h_rCol_rH_down,1h,Col under high R/FR,down,Sadown, lipoxygenase 2 ,ATLOX2;LOX2
154,AT1G52400,myc234_1h_rCol_rH_down,1h,Col under high R/FR,down,Sadown, beta glucosidase 18 ,ATBG1;BGL1;BGLU18
155,AT5G61420,myc234_1h_rCol_rH_up,1h,Col under high R/FR,up,ABAdown, myb domain protein 28 ,AtMYB28;HAG1;MYB28;PMG1
156,AT1G52190,myc234_1h_rCol_rH_up,1h,Col under high R/FR,up,ABAdown, Major facilitator superfamily protein ,AtNPF1.2;NPF1.2;NRT1.11
157,AT4G27300,myc234_1h_rCol_rH_up,1h,Col under high R/FR,up,ABAdown, S-locus lectin protein kinase family protein ,NA
158,AT5G47220,myc234_1h_rCol_rH_up,1h,Col under high R/FR,up,ABAdown, ethylene responsive element binding factor 2 ,ATERF-2;ATERF2;ERF2
159,AT4G16860,myc234_1h_rCol_rH_up,1h,Col under high R/FR,up,ABAdown, Disease resistance protein (TIR-NBS-LRR class) family ,RPP4
160,AT4G12980,myc234_1h_rCol_rH_up,1h,Col under high R/FR,up,ABAdown, Auxin-responsive family protein ,NA
161,AT1G31770,myc234_1h_rCol_rH_up,1h,Col under high R/FR,up,ABAdown, ATP-binding cassette 14 ,ABCG14;AtABCG14
162,AT3G02380,myc234_1h_rCol_rH_up,1h,Col under high R/FR,up,MJdown, CONSTANS-like 2 ,ATCOL2;BBX3;COL2
163,AT5G45950,myc234_1h_rCol_rH_up,1h,Col under high R/FR,up,MJdown, GDSL-like Lipase/Acylhydrolase superfamily protein ,NA
164,AT1G26560,myc234_1h_rCol_rH_up,1h,Col under high R/FR,up,MJdown, beta glucosidase 40 ,BGLU40
165,AT1G67750,myc234_1h_rCol_rH_up,1h,Col under high R/FR,up,MJdown, Pectate lyase family protein ,NA
166,AT4G08150,myc234_1h_rCol_rH_up,1h,Col under high R/FR,up,MJdown, KNOTTED-like from Arabidopsis thaliana ,BP;BP1;KNAT1
167,AT1G13080,myc234_1h_rCol_rH_up,1h,Col under high R/FR,up,MJdown," cytochrome P450, family 71, subfamily B, polypeptide 2 ",CYP71B2
168,AT1G31770,myc234_1h_rCol_rH_up,1h,Col under high R/FR,up,MJdown, ATP-binding cassette 14 ,ABCG14;AtABCG14
169,AT5G62280,myc234_1h_rCol_rH_up,1h,Col under high R/FR,up,MJdown, Protein of unknown function (DUF1442) ,NA
170,AT3G50340,myc234_1h_rCol_rH_up,1h,Col under high R/FR,up,MJdown, unknown protein; BEST Arabidopsis thaliana protein match is: unknown protein (TAIR:AT5G67020.1); Has 128 Blast hits to 128 proteins in 39 species: Archae - 0; Bacteria - 46; Metazoa - 0; Fungi - 3; Plants - 76; Viruses - 0; Other Eukaryotes - 3 (source: NCBI BLink). ,NA
171,AT1G18710,myc234_1h_rCol_rH_up,1h,Col under high R/FR,up,MYC234down, myb domain protein 47 ,AtMYB47;MYB47
172,AT4G11320,myc234_1h_rCol_rH_up,1h,Col under high R/FR,up,MYC234down, Papain family cysteine protease ,AtCP2;CP2
173,AT5G43500,myc234_1h_rCol_rH_up,1h,Col under high R/FR,up,MYC234down, actin-related protein 9 ,ARP9;ATARP9
174,AT4G21650,myc234_1h_rCol_rH_up,1h,Col under high R/FR,up,MYC234down, Subtilase family protein ,SBT3.13
175,AT5G61420,myc234_1h_rCol_rH_up,1h,Col under high R/FR,up,MYC234down, myb domain protein 28 ,AtMYB28;HAG1;MYB28;PMG1
176,AT1G60260,myc234_49h_rCol_rH_down,49h,Col under high R/FR,down,ACCup, beta glucosidase 5 ,BGLU5
177,AT2G44080,myc234_49h_rCol_rH_down,49h,Col under high R/FR,down,ACCup, ARGOS-like ,ARL
178,AT5G25350,myc234_49h_rCol_rH_down,49h,Col under high R/FR,down,ACCup, EIN3-binding F box protein 2 ,EBF2
179,AT5G01210,myc234_49h_rCol_rH_down,49h,Col under high R/FR,down,ACCup, HXXXD-type acyl-transferase family protein ,NA
180,AT3G58990,myc234_49h_rCol_rH_down,49h,Col under high R/FR,down,MJup, isopropylmalate isomerase 1 ,IPMI1
181,AT4G39940,myc234_49h_rCol_rH_down,49h,Col under high R/FR,down,MJup, APS-kinase 2 ,AKN2;APK2
182,AT1G18590,myc234_49h_rCol_rH_down,49h,Col under high R/FR,down,MJup, sulfotransferase 17 ,ATSOT17;ATST5C;SOT17
183,AT4G31500,myc234_49h_rCol_rH_down,49h,Col under high R/FR,down,MJup," cytochrome P450, family 83, subfamily B, polypeptide 1 ",ATR4;CYP83B1;RED1;RNT1;SUR2
184,AT2G14750,myc234_49h_rCol_rH_down,49h,Col under high R/FR,down,MJup, APS kinase ,AKN1;APK;APK1;ATAKN1
185,AT1G24100,myc234_49h_rCol_rH_down,49h,Col under high R/FR,down,MJup, UDP-glucosyl transferase 74B1 ,UGT74B1
186,AT2G20610,myc234_49h_rCol_rH_down,49h,Col under high R/FR,down,MJup, Tyrosine transaminase family protein ,ALF1;HLS3;RTY;RTY1;SUR1
187,AT1G65860,myc234_49h_rCol_rH_down,49h,Col under high R/FR,down,MJup, flavin-monooxygenase glucosinolate S-oxygenase 1 ,FMO GS-OX1
188,AT1G62560,myc234_49h_rCol_rH_down,49h,Col under high R/FR,down,MJup, flavin-monooxygenase glucosinolate S-oxygenase 3 ,FMO GS-OX3
189,AT3G22740,myc234_49h_rCol_rH_down,49h,Col under high R/FR,down,MJup, homocysteine S-methyltransferase 3 ,HMT3
190,AT1G74100,myc234_49h_rCol_rH_down,49h,Col under high R/FR,down,MJup, sulfotransferase 16 ,ATSOT16;ATST5A;CORI-7;SOT16
191,AT2G46650,myc234_49h_rCol_rH_down,49h,Col under high R/FR,down,MJup, cytochrome B5 isoform C ,ATCB5-C;B5 #1;CB5-C;CYTB5-C
192,AT4G39950,myc234_49h_rCol_rH_down,49h,Col under high R/FR,down,MJup," cytochrome P450, family 79, subfamily B, polypeptide 2 ",CYP79B2
193,AT2G22330,myc234_49h_rCol_rH_down,49h,Col under high R/FR,down,MJup," cytochrome P450, family 79, subfamily B, polypeptide 3 ",CYP79B3
194,AT5G44720,myc234_49h_rCol_rH_down,49h,Col under high R/FR,down,MJup, Molybdenum cofactor sulfurase family protein ,NA
195,AT4G30530,myc234_49h_rCol_rH_down,49h,Col under high R/FR,down,MJup, Class I glutamine amidotransferase-like superfamily protein ,GGP1
196,AT2G38860,myc234_49h_rCol_rH_down,49h,Col under high R/FR,down,MJup, Class I glutamine amidotransferase-like superfamily protein ,DJ-1e;DJ1E;YLS5
197,AT2G29450,myc234_49h_rCol_rH_down,49h,Col under high R/FR,down,MJup, glutathione S-transferase tau  5 ,AT103-1A;ATGSTU1;ATGSTU5;GSTU5
198,AT5G07460,myc234_49h_rCol_rH_down,49h,Col under high R/FR,down,MJup, peptidemethionine sulfoxide reductase 2 ,ATMSRA2;PMSR2
199,AT1G52040,myc234_49h_rCol_rH_down,49h,Col under high R/FR,down,MJup, myrosinase-binding protein 1 ,ATMBP;MBP1
200,AT1G14250,myc234_49h_rCol_rH_down,49h,Col under high R/FR,down,MJup, GDA1/CD39 nucleoside phosphatase family protein ,NA
201,AT4G14680,myc234_49h_rCol_rH_down,49h,Col under high R/FR,down,MJup, Pseudouridine synthase/archaeosine transglycosylase-like family protein ,APS3;ATPS3
202,AT1G52000,myc234_49h_rCol_rH_down,49h,Col under high R/FR,down,MJup, Mannose-binding lectin superfamily protein ,NA
203,AT3G28220,myc234_49h_rCol_rH_down,49h,Col under high R/FR,down,MJup, TRAF-like family protein ,NA
204,AT5G54390,myc234_49h_rCol_rH_down,49h,Col under high R/FR,down,MJup, HAL2-like ,AHL;ATAHL;HL
205,AT2G39330,myc234_49h_rCol_rH_down,49h,Col under high R/FR,down,MJup, jacalin-related lectin 23 ,JAL23
206,AT5G06870,myc234_49h_rCol_rH_down,49h,Col under high R/FR,down,MJup, polygalacturonase inhibiting protein 2 ,ATPGIP2;PGIP2
207,AT1G60260,myc234_49h_rCol_rH_down,49h,Col under high R/FR,down,MJup, beta glucosidase 5 ,BGLU5
208,AT3G03190,myc234_49h_rCol_rH_down,49h,Col under high R/FR,down,MJup, glutathione S-transferase F11 ,ATGSTF11;ATGSTF6;GSTF11
209,AT1G52410,myc234_49h_rCol_rH_down,49h,Col under high R/FR,down,MJup, TSK-associating protein 1 ,AtTSA1;TSA1
210,AT2G43530,myc234_49h_rCol_rH_down,49h,Col under high R/FR,down,MJup, Scorpion toxin-like knottin superfamily protein ,NA
211,AT5G46760,myc234_49h_rCol_rH_down,49h,Col under high R/FR,down,MJup, Basic helix-loop-helix (bHLH) DNA-binding family protein ,MYC3
212,AT4G18440,myc234_49h_rCol_rH_down,49h,Col under high R/FR,down,MJup, L-Aspartase-like family protein ,NA
213,AT2G32150,myc234_49h_rCol_rH_down,49h,Col under high R/FR,down,MJup, Haloacid dehalogenase-like hydrolase (HAD) superfamily protein ,NA
214,AT5G63980,myc234_49h_rCol_rH_down,49h,Col under high R/FR,down,MJup, Inositol monophosphatase family protein ,ALX8;AtFRY1;ATSAL1;FRY1;HOS2;RON1;SAL1;SUPO1
215,AT5G42650,myc234_49h_rCol_rH_down,49h,Col under high R/FR,down,MJup, allene oxide synthase ,AOS;CYP74A;DDE2
216,AT2G06050,myc234_49h_rCol_rH_down,49h,Col under high R/FR,down,MJup, oxophytodienoate-reductase 3 ,AtOPR3;DDE1;OPR3
217,AT5G02940,myc234_49h_rCol_rH_down,49h,Col under high R/FR,down,MJup, Protein of unknown function (DUF1012) ,NA
218,AT5G05730,myc234_49h_rCol_rH_down,49h,Col under high R/FR,down,MJup, anthranilate synthase alpha subunit 1 ,AMT1;ASA1;JDL1;TRP5;WEI2
219,AT2G36080,myc234_49h_rCol_rH_down,49h,Col under high R/FR,down,MJup, AP2/B3-like transcriptional factor family protein ,ABS2;NGAL1
220,AT1G58270,myc234_49h_rCol_rH_down,49h,Col under high R/FR,down,MJup, TRAF-like family protein ,ZW9
221,AT4G29700,myc234_49h_rCol_rH_down,49h,Col under high R/FR,down,MJup, Alkaline-phosphatase-like family protein ,NA
222,AT3G16470,myc234_49h_rCol_rH_down,49h,Col under high R/FR,down,MJup, Mannose-binding lectin superfamily protein ,AtJAC1;JAL35;JR1
223,AT1G24625,myc234_49h_rCol_rH_down,49h,Col under high R/FR,down,MJup, zinc finger protein 7 ,ZFP7
224,AT1G20510,myc234_49h_rCol_rH_down,49h,Col under high R/FR,down,MJup, OPC-8:0 CoA ligase1 ,OPCL1
225,AT2G43550,myc234_49h_rCol_rH_down,49h,Col under high R/FR,down,MJup, Scorpion toxin-like knottin superfamily protein ,NA
226,AT5G24780,myc234_49h_rCol_rH_down,49h,Col under high R/FR,down,MJup, vegetative storage protein 1 ,ATVSP1;VSP1
227,AT3G25760,myc234_49h_rCol_rH_down,49h,Col under high R/FR,down,MJup, allene oxide cyclase 1 ,AOC1;ERD12
228,AT2G03980,myc234_49h_rCol_rH_down,49h,Col under high R/FR,down,MJup, GDSL-like Lipase/Acylhydrolase superfamily protein ,NA
229,AT4G24350,myc234_49h_rCol_rH_down,49h,Col under high R/FR,down,MJup, Phosphorylase superfamily protein ,NA
230,AT4G27860,myc234_49h_rCol_rH_down,49h,Col under high R/FR,down,MJup, vacuolar iron transporter (VIT) family protein ,MEB1
231,AT1G70700,myc234_49h_rCol_rH_down,49h,Col under high R/FR,down,MJup, TIFY domain/Divergent CCT motif family protein ,JAZ9;TIFY7
232,AT1G12240,myc234_49h_rCol_rH_down,49h,Col under high R/FR,down,MJup, Glycosyl hydrolases family 32 protein ,ATBETAFRUCT4;AtFRUCT4;AtVI2;FRUCT4;VAC-INV;VI2
233,AT4G15210,myc234_49h_rCol_rH_down,49h,Col under high R/FR,down,MJup, beta-amylase 5 ,AT-BETA-AMY;ATBETA-AMY;BAM5;BMY1;RAM1
234,AT3G23030,myc234_49h_rCol_rH_down,49h,Col under high R/FR,down,MJup, indole-3-acetic acid inducible 2 ,IAA2
235,AT1G53870,myc234_49h_rCol_rH_down,49h,Col under high R/FR,down,MJup, Protein of unknown function (DUF567) ,NA
236,AT3G50270,myc234_49h_rCol_rH_down,49h,Col under high R/FR,down,MJup, HXXXD-type acyl-transferase family protein ,NA
237,AT2G04400,myc234_49h_rCol_rH_down,49h,Col under high R/FR,down,MJup, Aldolase-type TIM barrel family protein ,IGPS
238,AT1G17380,myc234_49h_rCol_rH_down,49h,Col under high R/FR,down,MJup, jasmonate-zim-domain protein 5 ,JAZ5;TIFY11A
239,AT1G52400,myc234_49h_rCol_rH_down,49h,Col under high R/FR,down,MJup, beta glucosidase 18 ,ATBG1;BGL1;BGLU18
240,AT1G56650,myc234_49h_rCol_rH_down,49h,Col under high R/FR,down,MJup, production of anthocyanin pigment 1 ,ATMYB75;AtPAP1;MYB75;PAP1;SIAA1
241,AT5G16190,myc234_49h_rCol_rH_down,49h,Col under high R/FR,down,MJup, cellulose synthase like A11 ,ATCSLA11;CSLA11
242,AT4G17470,myc234_49h_rCol_rH_down,49h,Col under high R/FR,down,MJup, alpha/beta-Hydrolases superfamily protein ,NA
243,AT5G67150,myc234_49h_rCol_rH_down,49h,Col under high R/FR,down,MJup, HXXXD-type acyl-transferase family protein ,NA
244,AT1G66100,myc234_49h_rCol_rH_down,49h,Col under high R/FR,down,MJup, Plant thionin ,NA
245,AT1G44350,myc234_49h_rCol_rH_down,49h,Col under high R/FR,down,MJup, IAA-leucine resistant (ILR)-like gene 6 ,ILL6
246,AT3G54640,myc234_49h_rCol_rH_down,49h,Col under high R/FR,down,MJup, tryptophan synthase alpha chain ,TRP3;TSA1
247,AT1G54050,myc234_49h_rCol_rH_down,49h,Col under high R/FR,down,MJup, HSP20-like chaperones superfamily protein ,NA
248,AT3G05640,myc234_49h_rCol_rH_down,49h,Col under high R/FR,down,MJup, Protein phosphatase 2C family protein ,EGR1
249,AT2G47180,myc234_49h_rCol_rH_down,49h,Col under high R/FR,down,MJup, galactinol synthase 1 ,AtGolS1;GolS1
250,AT1G19670,myc234_49h_rCol_rH_down,49h,Col under high R/FR,down,MJup, chlorophyllase 1 ,ATCLH1;ATHCOR1;CLH1;CORI1
251,AT1G11440,myc234_49h_rCol_rH_down,49h,Col under high R/FR,down,MJup, BEST Arabidopsis thaliana protein match is: glycine-rich protein (TAIR:AT3G29075.1); Has 19337 Blast hits to 8589 proteins in 488 species: Archae - 26; Bacteria - 641; Metazoa - 7852; Fungi - 2167; Plants - 955; Viruses - 616; Other Eukaryotes - 7080 (source: NCBI BLink). ,NA
252,AT1G31550,myc234_49h_rCol_rH_down,49h,Col under high R/FR,down,MJup, GDSL-like Lipase/Acylhydrolase superfamily protein ,NA
253,AT1G60270,myc234_49h_rCol_rH_down,49h,Col under high R/FR,down,MJup, beta glucosidase 6 ,BGLU6
254,AT5G14120,myc234_49h_rCol_rH_down,49h,Col under high R/FR,down,MJup, Major facilitator superfamily protein ,NA
255,AT3G05165,myc234_49h_rCol_rH_down,49h,Col under high R/FR,down,MJup, Major facilitator superfamily protein ,NA
256,AT3G51450,myc234_49h_rCol_rH_down,49h,Col under high R/FR,down,MJup, Calcium-dependent phosphotriesterase superfamily protein ,NA
257,AT5G55120,myc234_49h_rCol_rH_down,49h,Col under high R/FR,down,MJup, galactose-1-phosphate guanylyltransferase (GDP)s;GDP-D-glucose phosphorylases;quercetin 4'-O-glucosyltransferases ,VTC5
258,AT1G32640,myc234_49h_rCol_rH_down,49h,Col under high R/FR,down,MJup, Basic helix-loop-helix (bHLH) DNA-binding family protein ,ATMYC2;JAI1;JIN1;MYC2;RD22BP1;ZBF1
259,AT4G34920,myc234_49h_rCol_rH_down,49h,Col under high R/FR,down,MJup, PLC-like phosphodiesterases superfamily protein ,NA
260,AT1G66760,myc234_49h_rCol_rH_down,49h,Col under high R/FR,down,MJup, MATE efflux family protein ,NA
261,AT3G28290,myc234_49h_rCol_rH_down,49h,Col under high R/FR,down,MJup, Protein of unknown function (DUF677) ,AT14A
262,AT2G40475,myc234_49h_rCol_rH_down,49h,Col under high R/FR,down,MJup, unknown protein; BEST Arabidopsis thaliana protein match is: unknown protein (TAIR:AT3G56260.2); Has 477 Blast hits to 219 proteins in 41 species: Archae - 0; Bacteria - 4; Metazoa - 91; Fungi - 61; Plants - 144; Viruses - 0; Other Eukaryotes - 177 (source: NCBI BLink). ,ASG8
263,AT5G23820,myc234_49h_rCol_rH_down,49h,Col under high R/FR,down,MJup, MD-2-related lipid recognition domain-containing protein ,ML3
264,AT4G13410,myc234_49h_rCol_rH_down,49h,Col under high R/FR,down,MJup, Nucleotide-diphospho-sugar transferases superfamily protein ,ATCSLA15;CSLA15
265,AT5G39790,myc234_49h_rCol_rH_down,49h,Col under high R/FR,down,MJup, 5'-AMP-activated protein kinase-related ,PTST
266,AT1G16410,myc234_49h_rCol_rH_down,49h,Col under high R/FR,down,MYC234up, cytochrome p450 79f1 ,BUS1;CYP79F1;SPS1
267,AT2G43100,myc234_49h_rCol_rH_down,49h,Col under high R/FR,down,MYC234up, isopropylmalate isomerase 2 ,ATLEUD1;IPMI2
268,AT5G23010,myc234_49h_rCol_rH_down,49h,Col under high R/FR,down,MYC234up, methylthioalkylmalate synthase 1 ,GSM1;IMS3;MAM1
269,AT3G19710,myc234_49h_rCol_rH_down,49h,Col under high R/FR,down,MYC234up, branched-chain aminotransferase4 ,BCAT4
270,AT5G14200,myc234_49h_rCol_rH_down,49h,Col under high R/FR,down,MYC234up, isopropylmalate dehydrogenase 1 ,ATIMD1;IMD1
271,AT4G13770,myc234_49h_rCol_rH_down,49h,Col under high R/FR,down,MYC234up," cytochrome P450, family 83, subfamily A, polypeptide 1 ",CYP83A1;REF2
272,AT3G02020,myc234_49h_rCol_rH_down,49h,Col under high R/FR,down,MYC234up, aspartate kinase 3 ,AK3
273,AT3G58990,myc234_49h_rCol_rH_down,49h,Col under high R/FR,down,MYC234up, isopropylmalate isomerase 1 ,IPMI1
274,AT2G25450,myc234_49h_rCol_rH_down,49h,Col under high R/FR,down,MYC234up, 2-oxoglutarate (2OG) and Fe(II)-dependent oxygenase superfamily protein ,NA
275,AT4G39940,myc234_49h_rCol_rH_down,49h,Col under high R/FR,down,MYC234up, APS-kinase 2 ,AKN2;APK2
276,AT1G18590,myc234_49h_rCol_rH_down,49h,Col under high R/FR,down,MYC234up, sulfotransferase 17 ,ATSOT17;ATST5C;SOT17
277,AT4G31500,myc234_49h_rCol_rH_down,49h,Col under high R/FR,down,MYC234up," cytochrome P450, family 83, subfamily B, polypeptide 1 ",ATR4;CYP83B1;RED1;RNT1;SUR2
278,AT3G54600,myc234_49h_rCol_rH_down,49h,Col under high R/FR,down,MYC234up, Class I glutamine amidotransferase-like superfamily protein ,DJ-1f;DJ1F
279,AT1G78370,myc234_49h_rCol_rH_down,49h,Col under high R/FR,down,MYC234up, glutathione S-transferase TAU 20 ,ATGSTU20;GSTU20
280,AT2G14750,myc234_49h_rCol_rH_down,49h,Col under high R/FR,down,MYC234up, APS kinase ,AKN1;APK;APK1;ATAKN1
281,AT4G04610,myc234_49h_rCol_rH_down,49h,Col under high R/FR,down,MYC234up, APS reductase 1 ,APR;APR1;ATAPR1;PRH19
282,AT4G14040,myc234_49h_rCol_rH_down,49h,Col under high R/FR,down,MYC234up, selenium-binding protein 2 ,EDA38;SBP2
283,AT1G24100,myc234_49h_rCol_rH_down,49h,Col under high R/FR,down,MYC234up, UDP-glucosyl transferase 74B1 ,UGT74B1
284,AT1G74090,myc234_49h_rCol_rH_down,49h,Col under high R/FR,down,MYC234up, desulfo-glucosinolate sulfotransferase 18 ,ATSOT18;ATST5B;SOT18
285,AT4G12030,myc234_49h_rCol_rH_down,49h,Col under high R/FR,down,MYC234up, bile acid transporter 5 ,BASS5;BAT5
286,AT2G20610,myc234_49h_rCol_rH_down,49h,Col under high R/FR,down,MYC234up, Tyrosine transaminase family protein ,ALF1;HLS3;RTY;RTY1;SUR1
287,AT1G65860,myc234_49h_rCol_rH_down,49h,Col under high R/FR,down,MYC234up, flavin-monooxygenase glucosinolate S-oxygenase 1 ,FMO GS-OX1
288,AT1G62560,myc234_49h_rCol_rH_down,49h,Col under high R/FR,down,MYC234up, flavin-monooxygenase glucosinolate S-oxygenase 3 ,FMO GS-OX3
289,AT1G74100,myc234_49h_rCol_rH_down,49h,Col under high R/FR,down,MYC234up, sulfotransferase 16 ,ATSOT16;ATST5A;CORI-7;SOT16
290,AT2G46650,myc234_49h_rCol_rH_down,49h,Col under high R/FR,down,MYC234up, cytochrome B5 isoform C ,ATCB5-C;B5 #1;CB5-C;CYTB5-C
291,AT4G39950,myc234_49h_rCol_rH_down,49h,Col under high R/FR,down,MYC234up," cytochrome P450, family 79, subfamily B, polypeptide 2 ",CYP79B2
292,AT2G22330,myc234_49h_rCol_rH_down,49h,Col under high R/FR,down,MYC234up," cytochrome P450, family 79, subfamily B, polypeptide 3 ",CYP79B3
293,AT3G23570,myc234_49h_rCol_rH_down,49h,Col under high R/FR,down,MYC234up, alpha/beta-Hydrolases superfamily protein ,NA
294,AT4G30530,myc234_49h_rCol_rH_down,49h,Col under high R/FR,down,MYC234up, Class I glutamine amidotransferase-like superfamily protein ,GGP1
295,AT5G01500,myc234_49h_rCol_rH_down,49h,Col under high R/FR,down,MYC234up, thylakoid ATP/ADP carrier ,TAAC
296,AT1G52030,myc234_49h_rCol_rH_down,49h,Col under high R/FR,down,MYC234up, myrosinase-binding protein 2 ,F-ATMBP;MBP1.2;MBP2
297,AT2G31790,myc234_49h_rCol_rH_down,49h,Col under high R/FR,down,MYC234up, UDP-Glycosyltransferase superfamily protein ,NA
298,AT1G52040,myc234_49h_rCol_rH_down,49h,Col under high R/FR,down,MYC234up, myrosinase-binding protein 1 ,ATMBP;MBP1
299,AT4G17880,myc234_49h_rCol_rH_down,49h,Col under high R/FR,down,MYC234up, Basic helix-loop-helix (bHLH) DNA-binding family protein ,MYC4
300,AT1G14250,myc234_49h_rCol_rH_down,49h,Col under high R/FR,down,MYC234up, GDA1/CD39 nucleoside phosphatase family protein ,NA
301,AT1G52000,myc234_49h_rCol_rH_down,49h,Col under high R/FR,down,MYC234up, Mannose-binding lectin superfamily protein ,NA
302,AT3G28220,myc234_49h_rCol_rH_down,49h,Col under high R/FR,down,MYC234up, TRAF-like family protein ,NA
303,AT2G39330,myc234_49h_rCol_rH_down,49h,Col under high R/FR,down,MYC234up, jacalin-related lectin 23 ,JAL23
304,AT3G49680,myc234_49h_rCol_rH_down,49h,Col under high R/FR,down,MYC234up, branched-chain aminotransferase 3 ,ATBCAT-3;BCAT3
305,AT3G03190,myc234_49h_rCol_rH_down,49h,Col under high R/FR,down,MYC234up, glutathione S-transferase F11 ,ATGSTF11;ATGSTF6;GSTF11
306,AT1G52410,myc234_49h_rCol_rH_down,49h,Col under high R/FR,down,MYC234up, TSK-associating protein 1 ,AtTSA1;TSA1
307,AT4G04830,myc234_49h_rCol_rH_down,49h,Col under high R/FR,down,MYC234up, methionine sulfoxide reductase B5 ,ATMSRB5;MSRB5
308,AT1G21440,myc234_49h_rCol_rH_down,49h,Col under high R/FR,down,MYC234up, Phosphoenolpyruvate carboxylase family protein ,NA
309,AT2G06050,myc234_49h_rCol_rH_down,49h,Col under high R/FR,down,MYC234up, oxophytodienoate-reductase 3 ,AtOPR3;DDE1;OPR3
310,AT5G05730,myc234_49h_rCol_rH_down,49h,Col under high R/FR,down,MYC234up, anthranilate synthase alpha subunit 1 ,AMT1;ASA1;JDL1;TRP5;WEI2
311,AT4G29700,myc234_49h_rCol_rH_down,49h,Col under high R/FR,down,MYC234up, Alkaline-phosphatase-like family protein ,NA
312,AT1G11580,myc234_49h_rCol_rH_down,49h,Col under high R/FR,down,MYC234up, methylesterase PCR A ,ATPMEPCRA;PMEPCRA
313,AT3G22840,myc234_49h_rCol_rH_down,49h,Col under high R/FR,down,MYC234up, Chlorophyll A-B binding family protein ,ELIP;ELIP1
314,AT2G40100,myc234_49h_rCol_rH_down,49h,Col under high R/FR,down,MYC234up, light harvesting complex photosystem II ,LHCB4.3
315,AT3G25760,myc234_49h_rCol_rH_down,49h,Col under high R/FR,down,MYC234up, allene oxide cyclase 1 ,AOC1;ERD12
316,AT1G52400,myc234_49h_rCol_rH_down,49h,Col under high R/FR,down,MYC234up, beta glucosidase 18 ,ATBG1;BGL1;BGLU18
317,AT1G56650,myc234_49h_rCol_rH_down,49h,Col under high R/FR,down,MYC234up, production of anthocyanin pigment 1 ,ATMYB75;AtPAP1;MYB75;PAP1;SIAA1
318,AT4G17470,myc234_49h_rCol_rH_down,49h,Col under high R/FR,down,MYC234up, alpha/beta-Hydrolases superfamily protein ,NA
319,AT1G44350,myc234_49h_rCol_rH_down,49h,Col under high R/FR,down,MYC234up, IAA-leucine resistant (ILR)-like gene 6 ,ILL6
320,AT1G19670,myc234_49h_rCol_rH_down,49h,Col under high R/FR,down,MYC234up, chlorophyllase 1 ,ATCLH1;ATHCOR1;CLH1;CORI1
321,AT1G32640,myc234_49h_rCol_rH_down,49h,Col under high R/FR,down,MYC234up, Basic helix-loop-helix (bHLH) DNA-binding family protein ,ATMYC2;JAI1;JIN1;MYC2;RD22BP1;ZBF1
322,AT4G39950,myc234_49h_rCol_rH_down,49h,Col under high R/FR,down,PIFtarget," cytochrome P450, family 79, subfamily B, polypeptide 2 ",CYP79B2
323,AT4G32280,myc234_49h_rCol_rH_down,49h,Col under high R/FR,down,PIFtarget, indole-3-acetic acid inducible 29 ,IAA29
324,AT2G42870,myc234_49h_rCol_rH_down,49h,Col under high R/FR,down,PIFtarget, phy rapidly regulated 1 ,HLH1;PAR1
325,AT1G18400,myc234_49h_rCol_rH_down,49h,Col under high R/FR,down,PIFtarget, BR enhanced expression 1 ,BEE1
326,AT1G70700,myc234_49h_rCol_rH_down,49h,Col under high R/FR,down,PIFtarget, TIFY domain/Divergent CCT motif family protein ,JAZ9;TIFY7
327,AT2G43060,myc234_49h_rCol_rH_down,49h,Col under high R/FR,down,PIFtarget, ILI1 binding bHLH 1 ,AtIBH1;IBH1
328,AT3G22210,myc234_49h_rCol_rH_down,49h,Col under high R/FR,down,Sadown, unknown protein; FUNCTIONS IN: molecular_function unknown; INVOLVED IN: biological_process unknown; LOCATED IN: endomembrane system; EXPRESSED IN: 21 plant structures; EXPRESSED DURING: 13 growth stages; Has 26 Blast hits to 26 proteins in 13 species: Archae - 0; Bacteria - 0; Metazoa - 0; Fungi - 0; Plants - 26; Viruses - 0; Other Eukaryotes - 0 (source: NCBI BLink). ,NA
329,AT5G48490,myc234_49h_rCol_rH_down,49h,Col under high R/FR,down,Sadown, Bifunctional inhibitor/lipid-transfer protein/seed storage 2S albumin superfamily protein ,DIR1-like
330,AT2G43530,myc234_49h_rCol_rH_down,49h,Col under high R/FR,down,Sadown, Scorpion toxin-like knottin superfamily protein ,NA
331,AT5G54250,myc234_49h_rCol_rH_down,49h,Col under high R/FR,down,Sadown, cyclic nucleotide-gated cation channel 4 ,ATCNGC4;CNGC4;DND2;HLM1
332,AT2G22170,myc234_49h_rCol_rH_down,49h,Col under high R/FR,down,Sadown," Lipase/lipooxygenase, PLAT/LH2 family protein ",PLAT2
333,AT4G33666,myc234_49h_rCol_rH_down,49h,Col under high R/FR,down,Sadown, unknown protein; FUNCTIONS IN: molecular_function unknown; INVOLVED IN: biological_process unknown; LOCATED IN: chloroplast; EXPRESSED IN: 19 plant structures; EXPRESSED DURING: 11 growth stages; Has 30201 Blast hits to 17322 proteins in 780 species: Archae - 12; Bacteria - 1396; Metazoa - 17338; Fungi - 3422; Plants - 5037; Viruses - 0; Other Eukaryotes - 2996 (source: NCBI BLink). ,NA
334,AT1G76080,myc234_49h_rCol_rH_down,49h,Col under high R/FR,down,Sadown, chloroplastic drought-induced stress protein of 32 kD ,ATCDSP32;CDSP32
335,AT5G62350,myc234_49h_rCol_rH_down,49h,Col under high R/FR,down,Sadown, Plant invertase/pectin methylesterase inhibitor superfamily protein ,NA
336,AT2G45180,myc234_49h_rCol_rH_down,49h,Col under high R/FR,down,Sadown, Bifunctional inhibitor/lipid-transfer protein/seed storage 2S albumin superfamily protein ,NA
337,AT1G51400,myc234_49h_rCol_rH_down,49h,Col under high R/FR,down,Sadown, Photosystem II 5 kD protein ,NA
338,AT3G47070,myc234_49h_rCol_rH_down,49h,Col under high R/FR,down,Sadown," LOCATED IN: thylakoid, chloroplast thylakoid membrane, chloroplast, chloroplast envelope; EXPRESSED IN: 22 plant structures; EXPRESSED DURING: 13 growth stages; CONTAINS InterPro DOMAIN/s: Thylakoid soluble phosphoprotein TSP9 (InterPro:IPR021584); Has 37 Blast hits to 37 proteins in 10 species: Archae - 0; Bacteria - 0; Metazoa - 0; Fungi - 0; Plants - 37; Viruses - 0; Other Eukaryotes - 0 (source: NCBI BLink). ",NA
339,AT1G52400,myc234_49h_rCol_rH_down,49h,Col under high R/FR,down,Sadown, beta glucosidase 18 ,ATBG1;BGL1;BGLU18
340,AT1G44575,myc234_49h_rCol_rH_down,49h,Col under high R/FR,down,Sadown, Chlorophyll A-B binding family protein ,CP22;NPQ4;PSBS
341,AT2G10940,myc234_49h_rCol_rH_down,49h,Col under high R/FR,down,Sadown, Bifunctional inhibitor/lipid-transfer protein/seed storage 2S albumin superfamily protein ,NA
342,AT3G45140,myc234_49h_rCol_rH_down,49h,Col under high R/FR,down,Sadown, lipoxygenase 2 ,ATLOX2;LOX2
343,AT5G61420,myc234_49h_rCol_rH_up,49h,Col under high R/FR,up,ABAdown, myb domain protein 28 ,AtMYB28;HAG1;MYB28;PMG1
344,AT4G16860,myc234_49h_rCol_rH_up,49h,Col under high R/FR,up,ABAdown, Disease resistance protein (TIR-NBS-LRR class) family ,RPP4
345,AT4G27300,myc234_49h_rCol_rH_up,49h,Col under high R/FR,up,ABAdown, S-locus lectin protein kinase family protein ,NA
346,AT1G53430,myc234_49h_rCol_rH_up,49h,Col under high R/FR,up,ABAdown, Leucine-rich repeat transmembrane protein kinase ,NILR2
347,AT2G46450,myc234_49h_rCol_rH_up,49h,Col under high R/FR,up,ABAdown, cyclic nucleotide-gated channel 12 ,ATCNGC12;CNGC12
348,AT5G02760,myc234_49h_rCol_rH_up,49h,Col under high R/FR,up,ABAdown, Protein phosphatase 2C family protein ,APD7;SSPP
349,AT1G64780,myc234_49h_rCol_rH_up,49h,Col under high R/FR,up,ABAdown, ammonium transporter 1;2 ,AMT1;2;ATAMT1;2
350,AT1G72300,myc234_49h_rCol_rH_up,49h,Col under high R/FR,up,ABAdown, Leucine-rich receptor-like protein kinase family protein ,PSY1R
351,AT1G31770,myc234_49h_rCol_rH_up,49h,Col under high R/FR,up,ABAdown, ATP-binding cassette 14 ,ABCG14;AtABCG14
352,AT1G67750,myc234_49h_rCol_rH_up,49h,Col under high R/FR,up,MJdown, Pectate lyase family protein ,NA
353,AT5G45950,myc234_49h_rCol_rH_up,49h,Col under high R/FR,up,MJdown, GDSL-like Lipase/Acylhydrolase superfamily protein ,NA
354,AT5G10550,myc234_49h_rCol_rH_up,49h,Col under high R/FR,up,MJdown, global transcription factor group E2 ,GTE2
355,AT5G62280,myc234_49h_rCol_rH_up,49h,Col under high R/FR,up,MJdown, Protein of unknown function (DUF1442) ,NA
356,AT3G02380,myc234_49h_rCol_rH_up,49h,Col under high R/FR,up,MJdown, CONSTANS-like 2 ,ATCOL2;BBX3;COL2
357,AT5G18670,myc234_49h_rCol_rH_up,49h,Col under high R/FR,up,MJdown, beta-amylase 3 ,BAM9;BMY3
358,AT5G02760,myc234_49h_rCol_rH_up,49h,Col under high R/FR,up,MJdown, Protein phosphatase 2C family protein ,APD7;SSPP
359,AT1G72300,myc234_49h_rCol_rH_up,49h,Col under high R/FR,up,MJdown, Leucine-rich receptor-like protein kinase family protein ,PSY1R
360,AT1G26560,myc234_49h_rCol_rH_up,49h,Col under high R/FR,up,MJdown, beta glucosidase 40 ,BGLU40
361,AT1G31770,myc234_49h_rCol_rH_up,49h,Col under high R/FR,up,MJdown, ATP-binding cassette 14 ,ABCG14;AtABCG14
362,AT5G43500,myc234_49h_rCol_rH_up,49h,Col under high R/FR,up,MYC234down, actin-related protein 9 ,ARP9;ATARP9
363,AT1G18710,myc234_49h_rCol_rH_up,49h,Col under high R/FR,up,MYC234down, myb domain protein 47 ,AtMYB47;MYB47
364,AT5G61420,myc234_49h_rCol_rH_up,49h,Col under high R/FR,up,MYC234down, myb domain protein 28 ,AtMYB28;HAG1;MYB28;PMG1
365,AT4G11320,myc234_49h_rCol_rH_up,49h,Col under high R/FR,up,MYC234down, Papain family cysteine protease ,AtCP2;CP2
366,AT4G21650,myc234_49h_rCol_rH_up,49h,Col under high R/FR,up,MYC234down, Subtilase family protein ,SBT3.13
367,AT5G23940,myc234_49h_rCol_rH_up,49h,Col under high R/FR,up,MYC234down, HXXXD-type acyl-transferase family protein ,DCR;EMB3009;PEL3
368,AT2G46830,myc234_49h_rCol_rH_up,49h,Col under high R/FR,up,PIFtarget, circadian clock associated 1 ,AtCCA1;CCA1
369,AT1G01060,myc234_49h_rCol_rH_up,49h,Col under high R/FR,up,PIFtarget, Homeodomain-like superfamily protein ,LHY;LHY1
370,AT5G02760,myc234_49h_rCol_rH_up,49h,Col under high R/FR,up,PIFtarget, Protein phosphatase 2C family protein ,APD7;SSPP
371,AT5G07000,myc234_49h_rCol_rH_up,49h,Col under high R/FR,up,PIFtarget, sulfotransferase 2B ,ATST2B;ST2B
372,AT3G14210,myc234_49h_rCol_rH_up,49h,Col under high R/FR,up,SAup, epithiospecifier modifier 1 ,ESM1
373,AT2G14560,myc234_49h_rCol_rH_up,49h,Col under high R/FR,up,SAup, Protein of unknown function (DUF567) ,LURP1
374,AT3G22231,myc234_49h_rCol_rH_up,49h,Col under high R/FR,up,SAup, pathogen and circadian controlled 1 ,PCC1
375,AT5G10760,myc234_49h_rCol_rH_up,49h,Col under high R/FR,up,SAup, Eukaryotic aspartyl protease family protein ,AED1
376,AT1G21250,myc234_49h_rCol_rH_up,49h,Col under high R/FR,up,SAup, cell wall-associated kinase ,AtWAK1;PRO25;WAK1
377,AT2G46600,myc234_49h_rCol_rH_up,49h,Col under high R/FR,up,SAup, Calcium-binding EF-hand family protein ,NA
378,AT2G14560,myc234_49h_rCol_rH_up,49h,Col under high R/FR,up,WRKY33down, Protein of unknown function (DUF567) ,LURP1
379,AT3G22231,myc234_49h_rCol_rH_up,49h,Col under high R/FR,up,WRKY33down, pathogen and circadian controlled 1 ,PCC1
380,AT5G10760,myc234_49h_rCol_rH_up,49h,Col under high R/FR,up,WRKY33down, Eukaryotic aspartyl protease family protein ,AED1
381,AT4G23900,myc234_49h_rCol_rH_up,49h,Col under high R/FR,up,WRKY33down, Nucleoside diphosphate kinase family protein ,NA
382,AT2G41410,myc234_49h_rCol_rH_up,49h,Col under high R/FR,up,WRKY33down, Calcium-binding EF-hand family protein ,NA
